# Supplementary material
Source: publisher figshare collection journal article supplement (https://acs.figshare.com/ndownloader/files/16237436)
Supplement: Supplementary file 1 [file 16237436]

**SUPPORTING INFORMATION**  
**For**  
**Rapid Prediction of Adsorption Isotherms of a Diverse Range of Molecules**  
**in Hyper-Crosslinked Polymers**

Dai Tang<sup>1</sup>, Grit Kupgan<sup>2</sup>, Coray M. Colina<sup>2,3</sup>, David S. Sholl<sup>1,\*</sup>

<sup>1</sup> School of Chemical & Biomolecular Engineering, Georgia Institute of Technology, Atlanta, GA  
30332-0100, USA

<sup>2</sup> Department of Materials Science and Engineering, University of Florida, Gainesville, FL 32611-  
7200, USA

<sup>3</sup> Department of Chemistry, University of Florida, Gainesville, FL 32611-7200, USA

Corresponding author: E-mail: david.sholl@chbe.gatech.edu

**Table of contents**

- 1) Structural properties of HCPs as functions of percentage of DVB and degree of crosslinking
- 2) Physical properties of molecules and force field parameters for HCPs
- 3) Calculated helium void fraction of HCPs and heat of adsorption for each molecule-HCP pair
- 4) Scaling factors
- 5) Estimated selectivity of molecular pairs using Freeman's model
- 6) Examples: check the convergence of GCMC simulations
- 7) Data shown in all figures in the main manuscript in tabular form
- 8) Supporting information references

# 1) Structural properties of HCPs as functions of percentage of DVB and degree of crosslinking

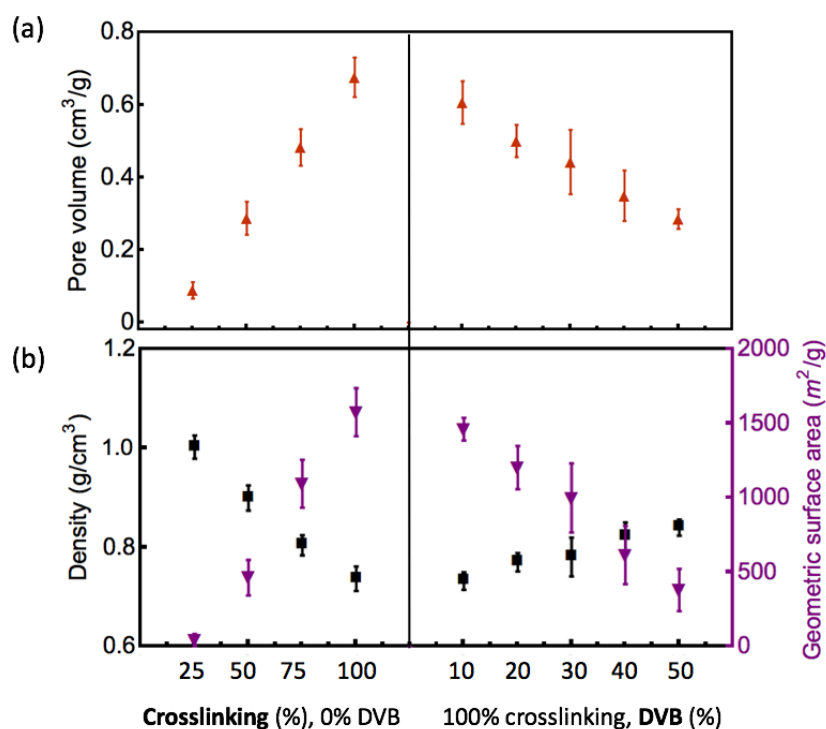

Figure S1: The effect of crosslinking and DVB on pore volume, density and geometric surface area of HCPs. The left panels show data as function of degree of crosslinking, and the right panels show data as function of percentage of DVB.

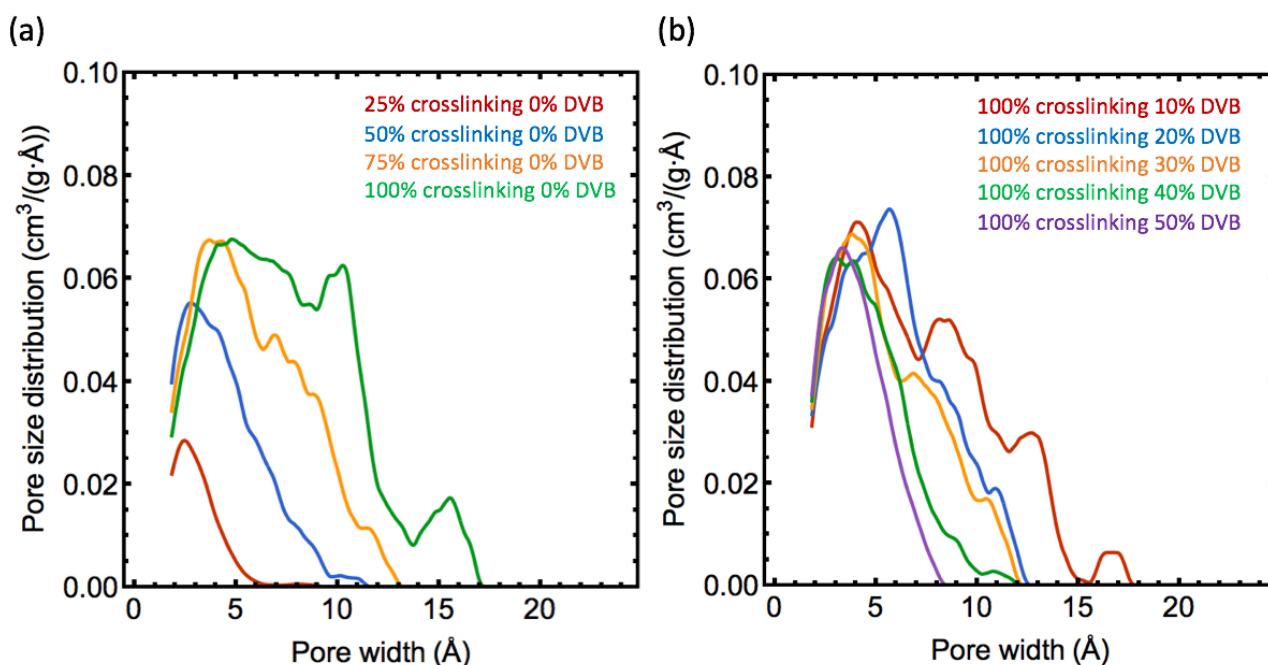

Figure S2: The effect of crosslinking and DVB on pore size distribution. The plots show the averaged results among 5 samples of each HCP.

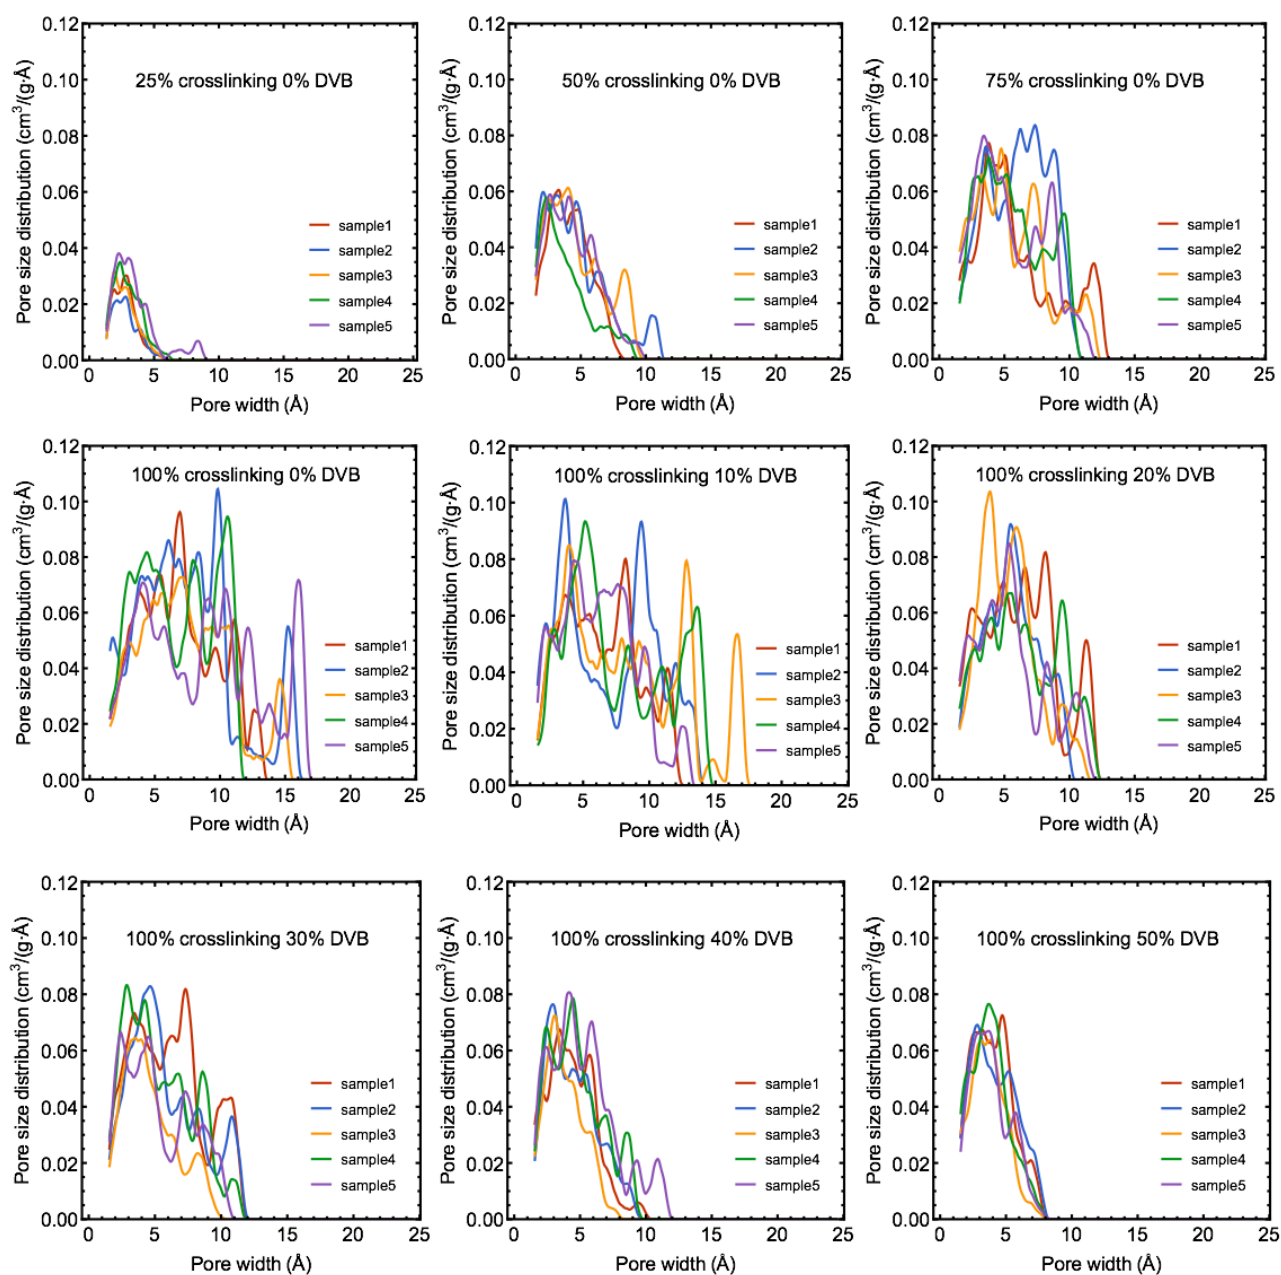

Figure S3: Pore size distribution in 5 samples of each HCP with different degrees of crosslinking and percentages of DVB.

## 2) Physical properties of molecules and force field parameters for HCPs

Table S1. List of molecular weight, bulk liquid density, critical temperature and vapor pressure of 24 molecules in this study.<sup>1-8</sup>

| Chemical formula                 | Name             | Molecular weight (g/mol) | Bulk liquid density (g/cm <sup>3</sup> ) | Critical temperature (K) | Vapor pressure (Pa) |
|----------------------------------|------------------|--------------------------|------------------------------------------|--------------------------|---------------------|
| CH <sub>4</sub>                  | Methane          | 16.04                    | 0.16                                     | 190.6                    | 4520000             |
| C <sub>2</sub> H <sub>4</sub>    | Ethene           | 28.05                    | 0.22                                     | 282.4                    | 3550430             |
| C <sub>2</sub> H <sub>6</sub>    | Ethane           | 30.07                    | 0.30                                     | 305.3                    | 3845280             |
| C <sub>2</sub> H <sub>3</sub> N  | Acetonitrile     | 41.05                    | 0.78                                     | 549.0                    | 11153               |
| C <sub>3</sub> H <sub>6</sub>    | Propene          | 42.08                    | 0.50                                     | 365.6                    | 1560410             |
| C <sub>2</sub> H <sub>4</sub> O  | Acetaldehyde     | 44.05                    | 0.78                                     | 463.4                    | 116078              |
| C <sub>3</sub> H <sub>8</sub>    | Propane          | 44.10                    | 0.49                                     | 369.8                    | 1023210             |
| C <sub>2</sub> H <sub>6</sub> O  | Dimethyl ether   | 46.07                    | 0.65                                     | 398.0                    | 623460              |
| CH <sub>4</sub> S                | Methanethiol     | 48.11                    | 0.86                                     | 475.0                    | 210719              |
| C <sub>3</sub> H <sub>5</sub> N  | Propionitrile    | 55.08                    | 0.77                                     | 556.0                    | 6287                |
| C <sub>3</sub> H <sub>6</sub> O  | Acetone          | 58.08                    | 0.70                                     | 508.0                    | 31925               |
| C <sub>3</sub> H <sub>8</sub> O  | Propan-1-ol      | 60.10                    | 0.80                                     | 538.0                    | 3878                |
| C <sub>3</sub> H <sub>8</sub> O  | Propan-2-ol      | 60.10                    | 0.79                                     | 502.0                    | 11634               |
| C <sub>2</sub> H <sub>6</sub> S  | Dimethyl sulfide | 62.13                    | 0.85                                     | 504.0                    | 69029               |
| C <sub>2</sub> H <sub>6</sub> S  | Ethanethiol      | 62.13                    | 0.86                                     | 502.0                    | 76657               |
| Kr                               | Krypton          | 83.80                    | 0.91                                     | 209.5                    | 5100000             |
| C <sub>4</sub> H <sub>4</sub> S  | Thiophene        | 84.14                    | 1.05                                     | 605.0                    | 12359               |
| C <sub>5</sub> H <sub>10</sub> O | 2-pentanone      | 86.13                    | 0.81                                     | 561.0                    | 5180                |
| C <sub>4</sub> H <sub>10</sub> S | Diethyl sulfide  | 90.19                    | 0.83                                     | 562.0                    | 8680                |
| C <sub>7</sub> H <sub>8</sub>    | Toluene          | 92.14                    | 0.87                                     | 593.0                    | 4182                |
| C <sub>6</sub> H <sub>14</sub> O | Dipropyl ether   | 102.17                   | 0.75                                     | 527.0                    | 8972                |
| C <sub>8</sub> H <sub>16</sub> O | Octanal          | 128.21                   | 0.82                                     | 627.2                    | 201.8               |
| C <sub>8</sub> H <sub>18</sub> O | Octan-1-ol       | 130.23                   | 0.82                                     | 629.0                    | 46.64               |
| Xe                               | Xenon            | 131.29                   | 1.10                                     | 289.7                    | 3183600             |

Table S2. Lennard-Jones parameters for united atoms of HCPs.<sup>2,9</sup>

| United atoms | $\epsilon/k_B$ (K) | $\sigma$ (Å) |
|--------------|--------------------|--------------|
| Lc1          | 10.0               | 4.65         |
| Lc2          | 46.0               | 3.95         |
| Cc0          | 21.0               | 3.88         |
| Ccp          | 50.50              | 3.695        |
| c1           | 10.0               | 4.65         |
| c2           | 46.0               | 3.95         |

In this study, no charges are used for the united atoms of HCPs. In order to test this approximation, we constructed all-atom models of each monomer and optimized each monomer at the PBE-D3 level of DFT using VASP. From the resulting electron densities, we assigned DDEC6 charges to the atoms of each monomer. The atomic charges in these HCP all-atom models are relatively small and can be neglected for the UAFF selected in this work (Figure S4 and Table 3).

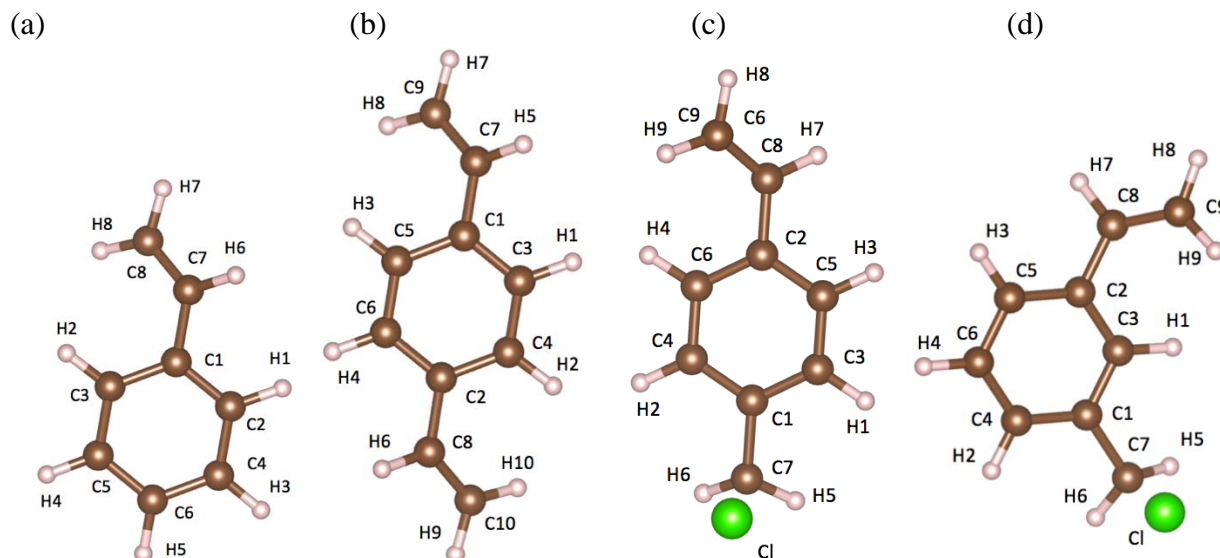

Figure S4: Structure of all atom models of (a) styrene (b) divinylbenzene (c) p-vinylbenzyl chloride and (d) m-vinylbenzyl chloride

Table 3. DDEC6 charges of atoms of all atom model of monomers. (a) styrene (b) divinylbenzene (c) p-vinylbenzyl chloride and (d) m-vinylbenzyl chloride.

(a) net charge=  $10^{-6}$  e

| Atom | Charge    | United atom |
|------|-----------|-------------|
| C1   | 0.104712  | Cc0         |
| C2   | -0.138522 | Ccp         |
| C3   | -0.122986 | Ccp         |
| C4   | -0.087447 | Ccp         |
| C5   | -0.088714 | Ccp         |
| C6   | -0.093552 | Ccp         |
| C7   | -0.070253 | Lc1         |
| C8   | -0.323909 | Lc2         |
| H1   | 0.095436  | Ccp         |
| H2   | 0.098029  | Ccp         |
| H3   | 0.09564   | Ccp         |
| H4   | 0.095724  | Ccp         |
| H5   | 0.088209  | Ccp         |
| H6   | 0.090308  | Lc1         |
| H7   | 0.127517  | Lc2         |
| H8   | 0.129807  | Lc2         |

| United Atom     | Charge    |
|-----------------|-----------|
| Lc1: C7, H6     | 0.020055  |
| Lc2: C8, H7, H8 | -0.066585 |
| Cc0: C1         | 0.104712  |
| Ccp: C2, H1     | -0.043086 |
| Ccp: C3, H2     | -0.024957 |
| Ccp: C4, H3     | 0.008193  |
| Ccp: C5, H4     | 0.00701   |
| Ccp: C6, H5     | -0.005343 |

(b) net charge=0 e

| Atom | Charge | United atom |
|------|--------|-------------|
|------|--------|-------------|

| United atom | Charge |
|-------------|--------|
|-------------|--------|

|     |           |     |
|-----|-----------|-----|
| C1  | 0.101598  | Cc0 |
| C2  | 0.101675  | Cc0 |
| C3  | -0.133599 | Ccp |
| C4  | -0.122374 | Ccp |
| C5  | -0.122987 | Ccp |
| C6  | -0.133753 | Ccp |
| C7  | -0.072112 | Lc1 |
| C8  | -0.072838 | Lc1 |
| C9  | -0.316638 | Lc2 |
| C10 | -0.316224 | Lc2 |
| H1  | 0.095327  | Ccp |
| H2  | 0.098999  | Ccp |
| H3  | 0.099152  | Ccp |
| H4  | 0.095385  | Ccp |
| H5  | 0.089626  | Lc1 |
| H6  | 0.089666  | Lc1 |
| H7  | 0.128419  | Lc2 |
| H8  | 0.131147  | Lc2 |
| H9  | 0.128322  | Lc2 |
| H10 | 0.131209  | Lc2 |

|                   |           |
|-------------------|-----------|
| Lc1: C7, H5       | 0.017514  |
| Lc1: C8, H6       | 0.016828  |
| Lc2: C9, H7, H8   | -0.057072 |
| Lc2: C10, H9, H10 | -0.056693 |
| Cc0: C1           | 0.101598  |
| Cc0: C2           | 0.101675  |
| Ccp: C3, H1       | -0.038272 |
| Ccp: C4, H2       | -0.023375 |
| Ccp: C5, H3       | -0.023835 |
| Ccp: C6, H4       | -0.038368 |

(c) net charge= 0 e

| Atom | Charge    | United atom |
|------|-----------|-------------|
| Cl   | -0.160652 | Cl          |
| C1   | 0.091238  | Cc0         |
| C2   | 0.109142  | Cc0         |
| C3   | -0.131939 | Ccp         |
| C4   | -0.132645 | Ccp         |
| C5   | -0.127985 | Ccp         |
| C6   | -0.118303 | Ccp         |
| C7   | -0.114105 | Cc2         |
| C8   | -0.080115 | Lc1         |
| C9   | -0.302446 | Lc2         |
| H1   | 0.101823  | Ccp         |
| H2   | 0.101904  | Ccp         |
| H3   | 0.100676  | Ccp         |
| H4   | 0.101476  | Ccp         |
| H5   | 0.112022  | Cc2         |
| H6   | 0.1123    | Cc2         |
| H7   | 0.087661  | Lc1         |
| H8   | 0.122294  | Lc2         |
| H9   | 0.127654  | Lc2         |

| United atom     | Charge    |
|-----------------|-----------|
| Lc1: C8, H7     | 0.007546  |
| Lc2: C9, H8, H9 | -0.052498 |
| Cc0: C1         | 0.091238  |
| Cc0: C2         | 0.109142  |
| Ccp: C3, H1     | -0.030116 |
| Ccp: C4, H2     | -0.030741 |
| Ccp: C5, H3     | -0.027309 |
| Ccp: C6, H4     | -0.016827 |
| Cc2: C7, H5, H6 | 0.110217  |
| Cl              | -0.160652 |

(d) net charge= $10^{-6}$  e

| Atom | Charge    | United atom |
|------|-----------|-------------|
| Cl   | -0.147183 | Cl          |
| C1   | 0.095714  | Cc0         |
| C2   | 0.113309  | Cc0         |
| C3   | -0.171148 | Ccp         |
| C4   | -0.139189 | Ccp         |
| C5   | -0.13209  | Ccp         |
| C6   | -0.079322 | Ccp         |
| C7   | -0.11314  | Cc2         |
| C8   | -0.076674 | Lc1         |
| C9   | -0.310624 | Lc2         |
| H1   | 0.100915  | Ccp         |
| H2   | 0.10139   | Ccp         |
| H3   | 0.100685  | Ccp         |
| H4   | 0.096527  | Ccp         |
| H5   | 0.112874  | Cc2         |
| H6   | 0.110156  | Cc2         |
| H7   | 0.0843    | Lc1         |
| H8   | 0.123625  | Lc2         |
| H9   | 0.129874  | Lc2         |

| United atom     | Charge    |
|-----------------|-----------|
| Lc1: C8, H7     | 0.007626  |
| Lc2: C9, H8, H9 | -0.057125 |
| Cc0: C1         | 0.095714  |
| Cc0: C2         | 0.113309  |
| Ccp: C3, H1     | -0.070233 |
| Ccp: C4, H2     | -0.037799 |
| Ccp: C5, H3     | -0.031405 |
| Ccp: C6, H4     | 0.017205  |
| Cc2: C7, H5, H6 | 0.10989   |
| Cl              | -0.147183 |

### 3) Calculated helium void fraction of HCPs and heat of adsorption for each molecule-HCP pair

Table S3. List of helium void fraction of each sample of HCPs.

| HCP                          | Helium void fraction $f_{\text{He}}$ |          |          |          |          |
|------------------------------|--------------------------------------|----------|----------|----------|----------|
|                              | Sample 1                             | Sample 2 | Sample 3 | Sample 4 | Sample 5 |
| 25% crosslinking<br>0% DVB   | 0.07                                 | 0.076    | 0.078    | 0.11     | 0.12     |
| 50% crosslinking<br>0% DVB   | 0.23                                 | 0.28     | 0.28     | 0.22     | 0.26     |
| 75% crosslinking<br>0% DVB   | 0.39                                 | 0.44     | 0.38     | 0.39     | 0.40     |
| 100% crosslinking<br>0% DVB  | 0.46                                 | 0.53     | 0.48     | 0.50     | 0.51     |
| 100% crosslinking<br>10% DVB | 0.45                                 | 0.47     | 0.49     | 0.47     | 0.47     |
| 100% crosslinking<br>20% DVB | 0.43                                 | 0.41     | 0.38     | 0.42     | 0.39     |
| 100% crosslinking<br>30% DVB | 0.42                                 | 0.38     | 0.31     | 0.36     | 0.34     |
| 100% crosslinking<br>40% DVB | 0.29                                 | 0.27     | 0.24     | 0.30     | 0.33     |
| 100% crosslinking<br>50% DVB | 0.26                                 | 0.27     | 0.22     | 0.21     | 0.23     |

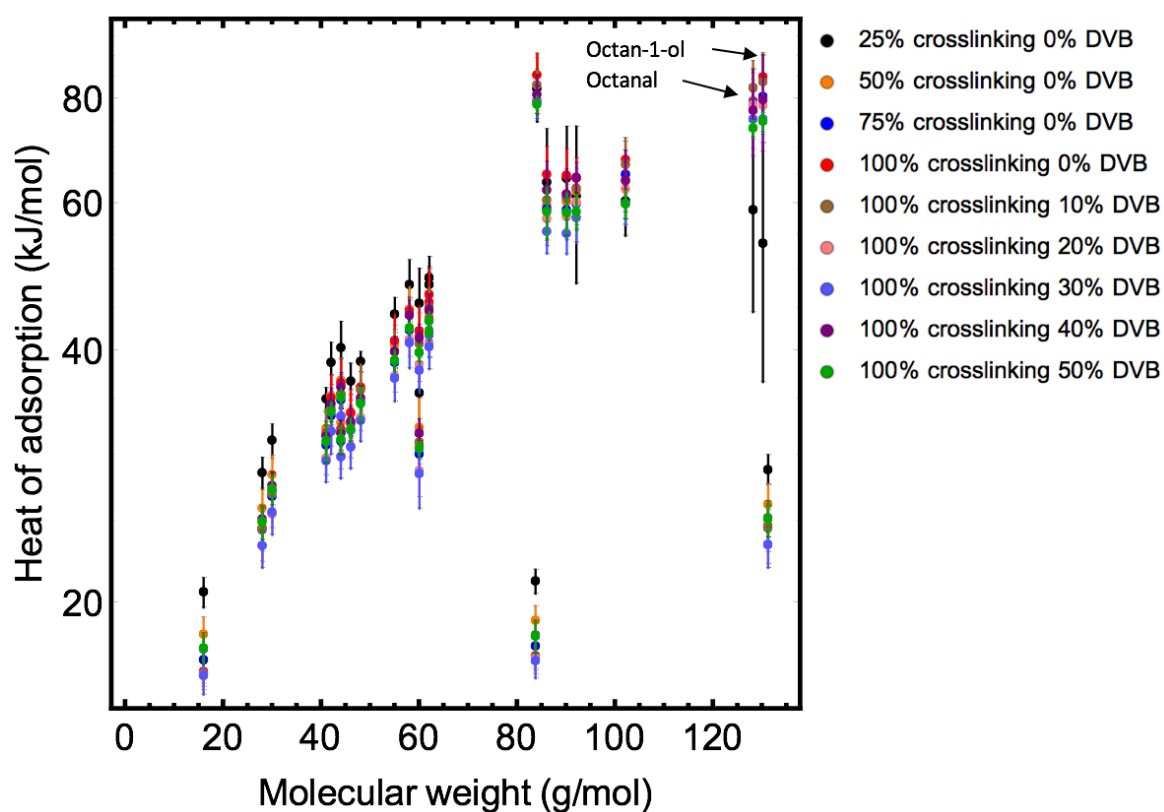

Figure S5: Heat of adsorption as function of molecular weight.



#### 4) Scaling factors

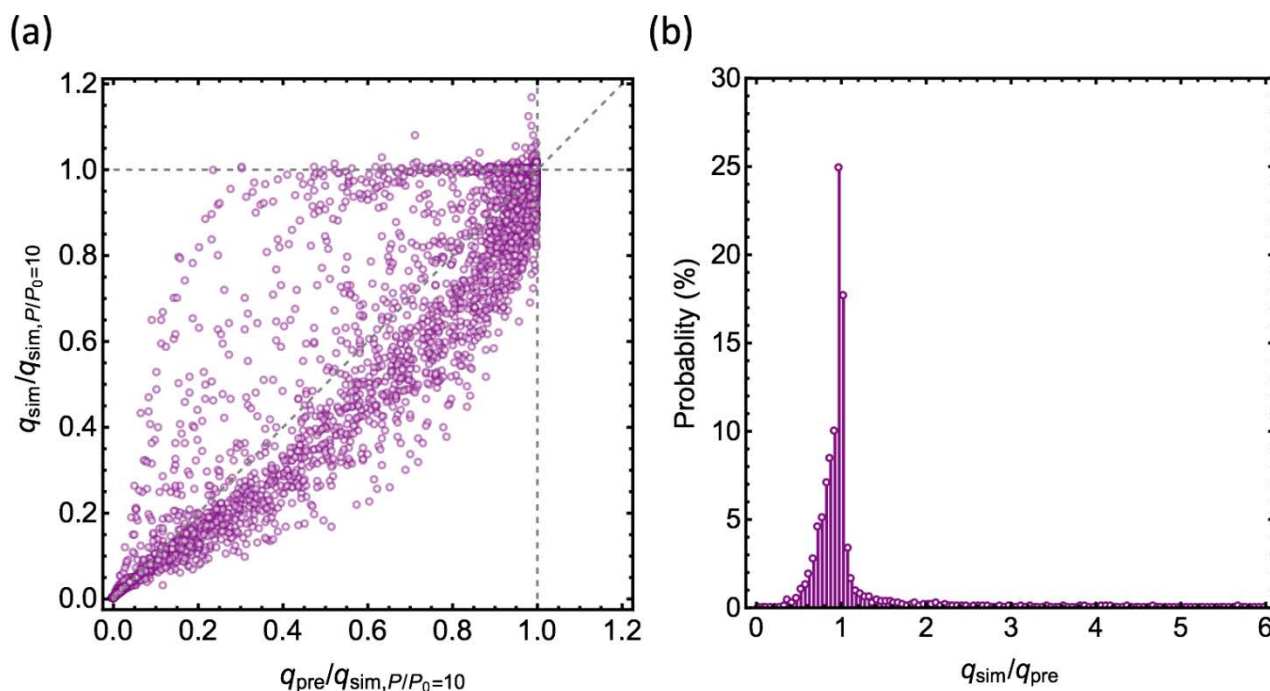

Figure S6: (a) Comparison of simulated adsorption loadings  $q_{\text{sim}}$  and predicted adsorption loadings  $q_{\text{pre}}$  for all molecule-HCP pairs, where the loadings are normalized by the simulated results at  $P/P_0=10$  in the corresponding isotherms. The  $q_{\text{pre}}$  are estimated by using the simulated Henry's constants and simulated saturation loadings in Langmuir model ( $q_{\text{sat}} = q_{\text{sim}, P/P_0=10}$ ). All data are the averaged results among 5 samples for each HCP. About 16% of simulated adsorption loadings have  $q_{\text{sim}}/q_{\text{sim}, P/P_0=10} > 1.0$ , but they are equal to  $q_{\text{sim}, P/P_0=10}$  within the standard deviation of loadings in 5 samples. (b) Distribution of the ratio of  $q_{\text{sim}}/q_{\text{pre}}$  of adsorption loadings for all molecule-HCP pairs.

The simulated and predicted adsorption isotherms of all molecule-HCP pairs in the form of Excel spreadsheets are available in the sub-folder of the accompanying .zip file.

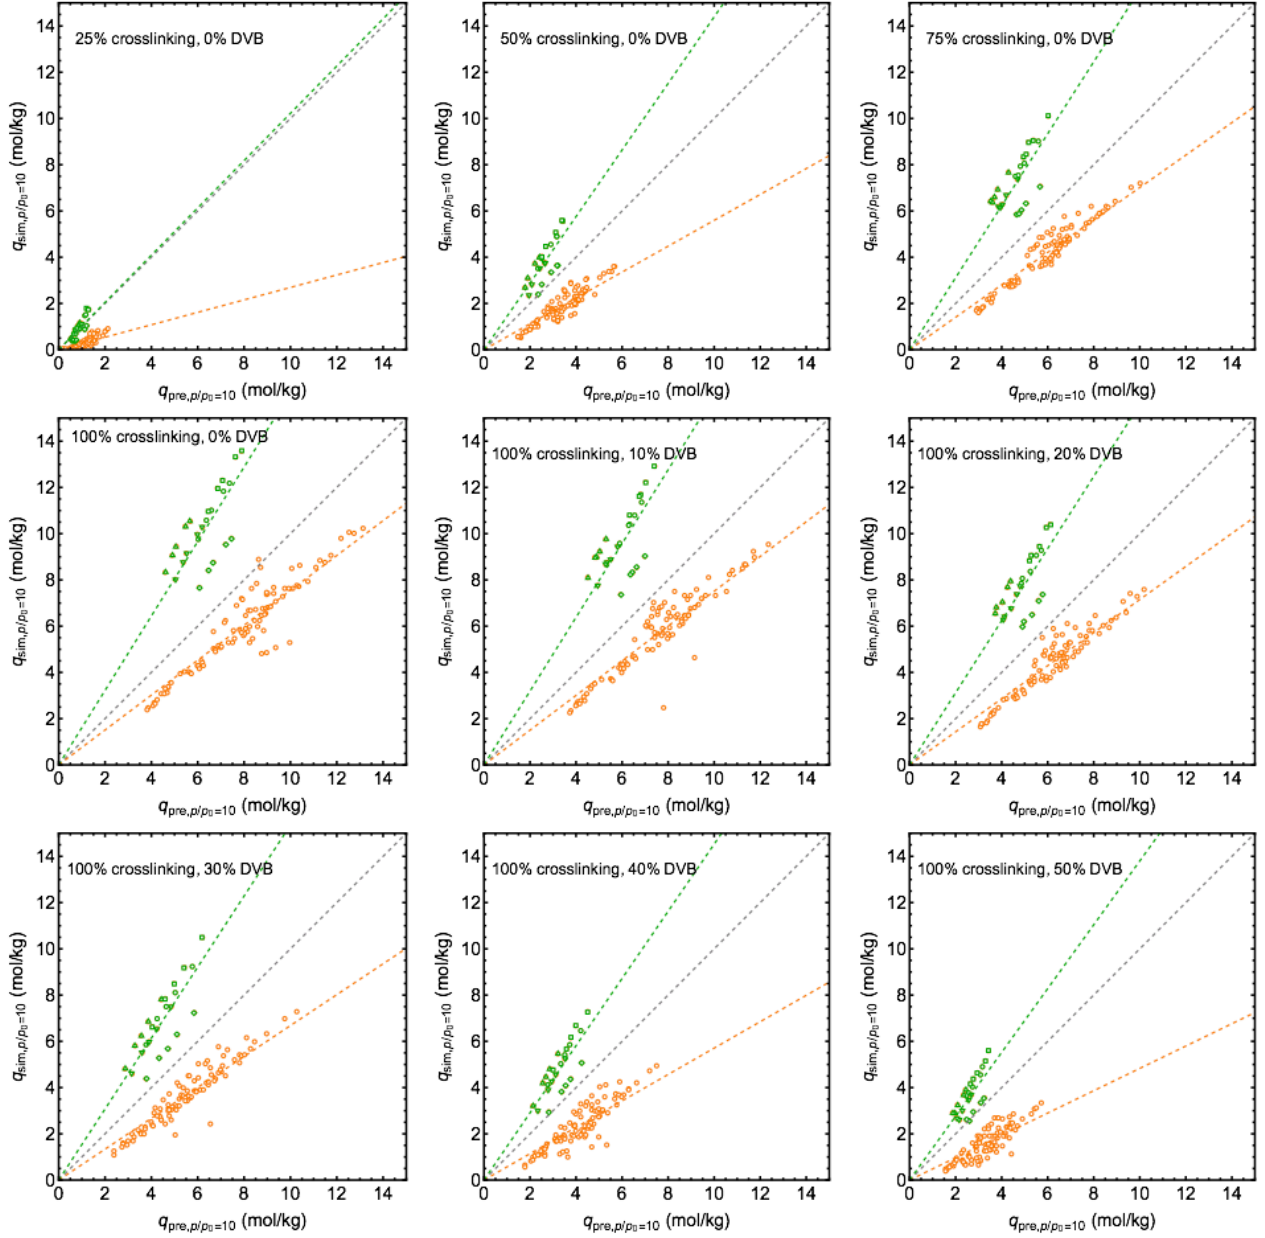

Figure S7: Comparison between  $q_{sim,P/P0=10}$  and  $q_{pre,P/P0=10}$  for molecule-sample pairs of each HCP. The data of group\_1 (orange) and data of group\_2 (green) are fitted to  $y=A*x$  respectively. For example, in HCP with 100% crosslinking and 0% DVB, we obtain fitted line  $y=0.79x$  for group\_1 (orange dashed line) and  $y=1.69x$  for group\_2 (green dashed line).

Table S4. List of scaling factors as function of degrees of crosslinking and percentages of DVB of HCPs, for molecules having critical temperature larger (group 1) or slightly smaller (group 2) than 300 K.

| $x$ =Crosslinking | $y$ =DVB | Scaling factor $s$ in group 1<br>$s=0.0072x-0.0069y+0.084$ | Scaling factor $s$ in group 2<br>$s=0.0087x-0.0066y+0.85$ |
|-------------------|----------|------------------------------------------------------------|-----------------------------------------------------------|
| 25                | 0        | 0.264                                                      | 1.07                                                      |
| 50                | 0        | 0.444                                                      | 1.29                                                      |
| 75                | 0        | 0.624                                                      | 1.50                                                      |
| 100               | 0        | 0.804                                                      | 1.72                                                      |
| 100               | 10       | 0.735                                                      | 1.65                                                      |
| 100               | 20       | 0.666                                                      | 1.59                                                      |
| 100               | 30       | 0.597                                                      | 1.52                                                      |
| 100               | 40       | 0.528                                                      | 1.46                                                      |
| 100               | 50       | 0.459                                                      | 1.39                                                      |

## 5) Estimated selectivity of molecular pairs using Freeman's model

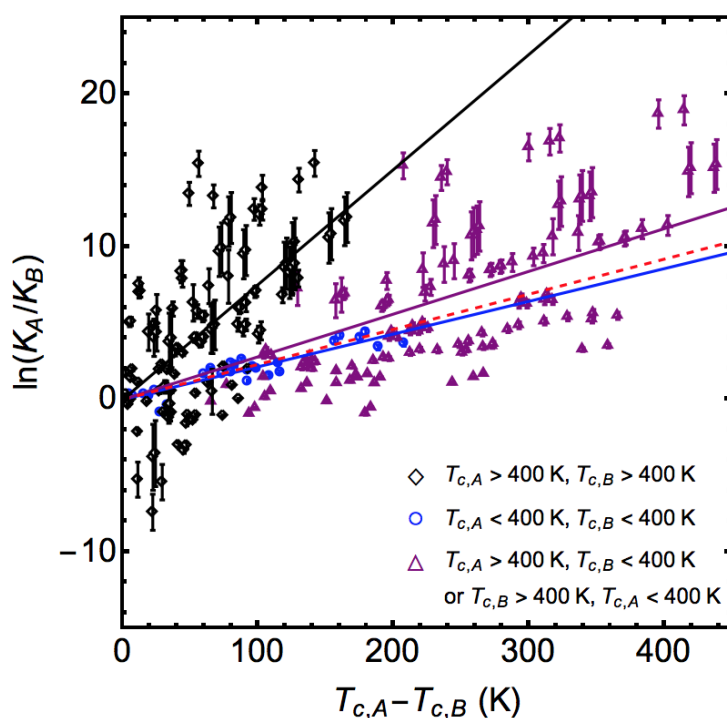

Figure S8: The median of log of Henry's constant ratio for each molecular pair as function of the critical temperature difference. The error bars represent the standard deviation of data among realizations of HCPs. There are 3 fitted lines obtained by fitting the data to Freeman's model, giving fitted factor  $N=0.075 \text{ K}^{-1}$  and  $R^2=2.859$  ( $R^2$  is the mean absolute standardized residuals) when  $T_{c,A}$  and  $T_{c,B}$  are larger than 400 K (black),  $N=0.021 \text{ K}^{-1}$  and  $R^2=0.448$  when  $T_{c,A}$  and  $T_{c,B}$  are smaller than 400 K (blue), and  $N=0.028 \text{ K}^{-1}$  and  $R^2=2.933$  when  $T_{c,A}$  and  $T_{c,B}$  are larger than and smaller than 400 K respectively (purple). The red dashed line shows the prediction of log of Henry's constant ratio using  $N=0.023 \text{ K}^{-1}$  of Freeman's model.

We find that Henry's constant and critical temperature of most of molecular pairs considered in this study do not obey a linear relationship, and they deviate far from the relationship with factor  $N=0.023 \text{ K}^{-1}$  of Freeman's model (red dashed line in Figure S8). For the data where the critical temperatures of the two molecules in those pairs are both greater than 400 K, the fitted  $N$  equals to  $0.075 \text{ K}^{-1}$ . And for pairs in which the critical temperature of one of the molecules is larger than 400 K, and that of the other molecule is not, the data gives  $N$  of  $0.028 \text{ K}^{-1}$ . Only for the data having critical temperatures of two molecules less than 400 K, a strong linear correlation of Henry's constant and critical temperature, is obtained  $N$  equal to  $0.021 \text{ K}^{-1}$ , i.e. similar to the factor  $N$  in Freeman's model. Previous works of Freeman's investigated the relationship between solubility and critical temperature, or the relationship between binding energy and critical temperature, for molecules with critical temperature less than 400 K.<sup>10-12</sup> That might explain why Freeman's model works well only for data in the limited temperature domain.

## 6) Examples: check the convergence of GCMC simulations

In order to check the convergence of the adsorption loadings if  $10^5$  Monte Carlo (MC) cycles are used for equilibrium and production runs respectively, we did following tests (Table S5), considering the adsorption for 2 kind of molecules with different sizes in 2 HCPs having various pore volumes, and different number of MC cycles. The low and high pressures tested are according to the vapor pressure of each molecule.

The rolling average of adsorption loadings as function of MC cycles of tests are shown in Figure S9 and Figure S10. By comparing the adsorption loadings listed in Table S5, we know that the adsorption loadings from GCMC simulations using RASPA get converged if  $10^5$  MC cycles for equilibrium run and  $10^5$  MC cycles for production run are used.

Table S5.

| HCP                                             | Molecule                         | Number of MC cycles for equilibrium and production respectively | (300 K) Pressure (Pa) | Adsorption loading (mol/kg) |
|-------------------------------------------------|----------------------------------|-----------------------------------------------------------------|-----------------------|-----------------------------|
| Sample 1 of HCP<br>100% crosslinking<br>0% DVB  | C <sub>8</sub> H <sub>18</sub> O | $10^5$                                                          | 0.004664              | 0.53343                     |
|                                                 |                                  | $10^6$                                                          |                       | 0.53688                     |
|                                                 | CH <sub>4</sub>                  | $10^5$                                                          | 45200.0               | 0.28904                     |
|                                                 |                                  | $10^6$                                                          |                       | 0.28927                     |
|                                                 |                                  | $10^5$                                                          | 45200000.0            | 9.74253                     |
|                                                 |                                  | $10^6$                                                          |                       | 9.73844                     |
| Sample 1 of HCP<br>100% crosslinking<br>50% DVB | C <sub>8</sub> H <sub>18</sub> O | $10^5$                                                          | 0.004664              | 0.02853                     |
|                                                 |                                  | $10^6$                                                          |                       | 0.02938                     |
|                                                 |                                  | $10^5$                                                          | 466.4                 | 0.80764                     |
|                                                 |                                  | $10^6$                                                          |                       | 0.77447                     |
|                                                 | CH <sub>4</sub>                  | $10^5$                                                          | 45200.0               | 0.15866                     |
|                                                 |                                  | $10^6$                                                          |                       | 0.15846                     |
|                                                 |                                  | $10^5$                                                          | 45200000.0            | 4.52557                     |
|                                                 |                                  | $10^6$                                                          |                       | 4.52478                     |

(a)

(b)

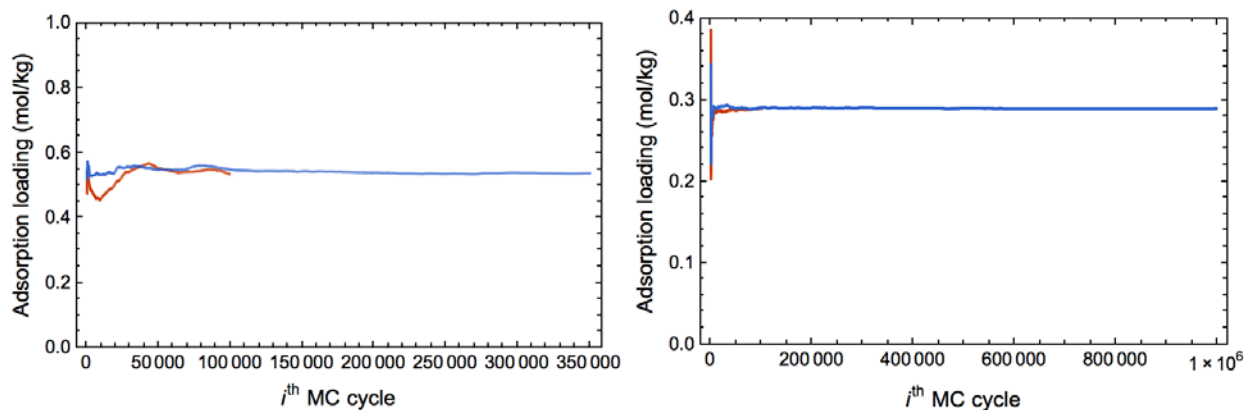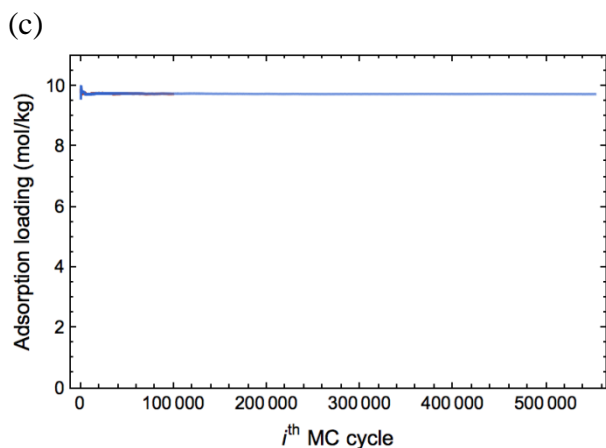

Figure S9: Rolling average of adsorption loading as function of MC cycle, where red line shows the data when  $10^5$  MC cycles are used for equilibrium and production runs respectively, and blue line shows the data when  $10^6$  MC cycles are used for equilibrium and production runs respectively. (a)  $\text{C}_8\text{H}_{18}\text{O}$  in sample 1 of HCP with 100% crosslinking and 0% DVB at 300 K and 0.004664 Pa.  $\text{CH}_4$  in sample 1 of HCP with 100% crosslinking and 0% DVB (b) at 300 K and 45200 Pa, and (c) at 300 K and 45200000 Pa.

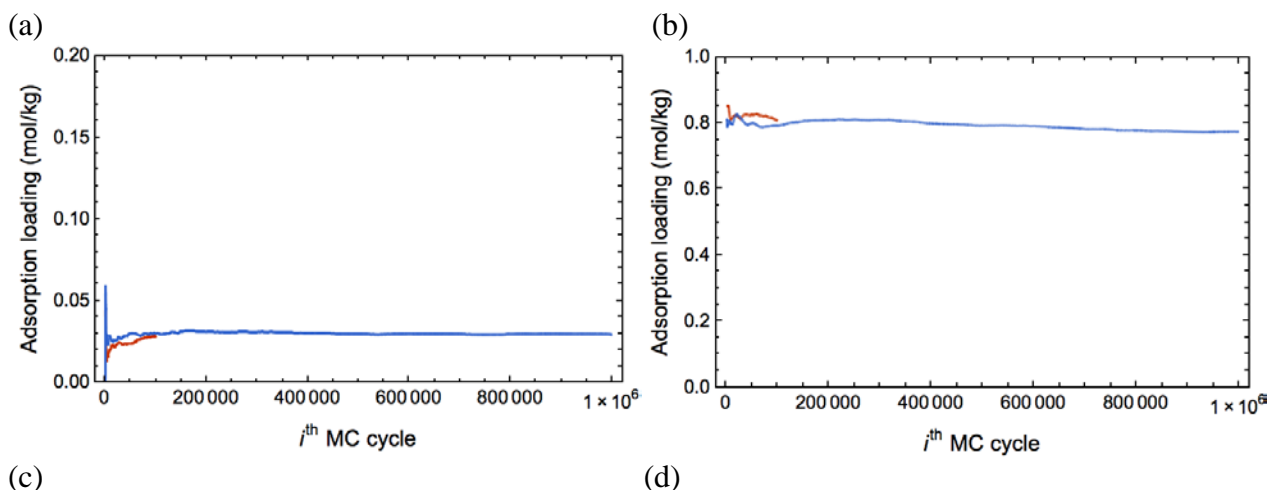

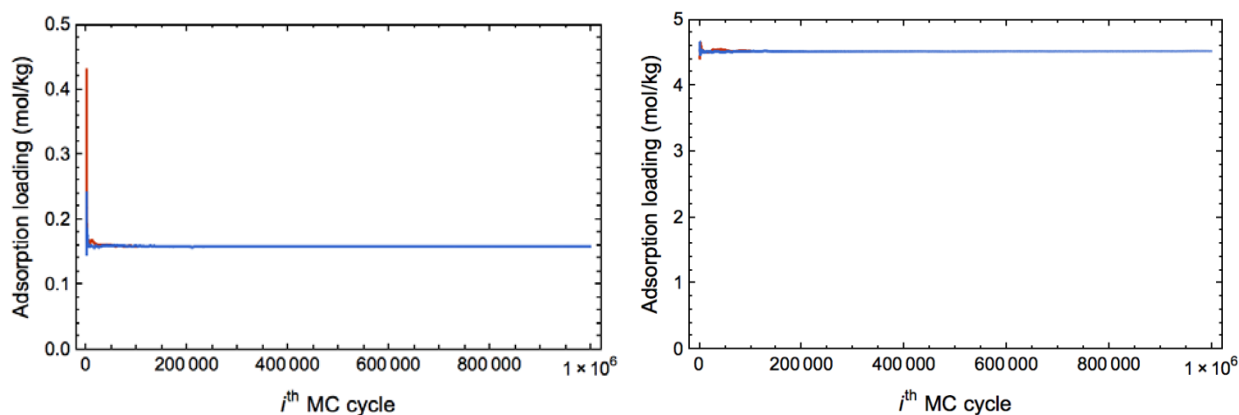

Figure S10: Rolling average of adsorption loading as function of MC cycle, where red line shows the data when  $10^5$  MC cycles are used for equilibrium and production runs respectively, and blue line shows the data when  $10^6$  MC cycles are used for equilibrium and production runs respectively.  $C_8H_{18}O$  in sample 1 of HCP with 100% crosslinking and 50% DVB (a) at 300 K and 0.004664 Pa, and (b) at 300 K and 466.4 Pa.  $CH_4$  in sample 1 of HCP with 100% crosslinking and 50% DVB (c) at 300 K and 45200 Pa, and (d) at 300 K and 45200000 Pa.

## 7) Data shown in all figures in the main manuscript

Data for all figures in the form of Excel spreadsheets are available in a separate .zip file with the file names noted below.

Figure 1a: XYZ files of 4 monomers: Fig1\_DVB.xyz, Fig1\_mVBC.xyz, Fig1\_pVBC.xyz and Fig1\_STR.xyz

Figure 1b: CIF file for sample 1 of HCP with 100% crosslinking and 10% DVB: PolymerModels(cif)/100crosslink\_10DVB\_1.cif

Figure 2a and 2b: hcps\_properties.xlsx

Figure 3a: simulation/CH4\_methane\_sim.xlsx

Figure 3b: simulation/C8H18O\_octan-1-ol\_sim.xlsx

Figure 4: HenryConstant.xlsx

Figure 5a: Fig5a\_QsimQpre\_group1.xlsx and Fig5a\_QsimQpre\_group2.xlsx

Figure 5b: Fig5b\_QsimQpre\_group1.xlsx and Fig5b\_QsimQpre\_group2.xlsx

Figure 5c and 5d: Table S4 in SI

Figure 6: RelativeError.xlsx

Figure 7a and 7b: Selectivity.xlsx

## 8) Supporting Information References

- (1) *NIST Chemistry WebBook*; Linstrom, P. J.; Mallard, W. G., Eds.; NIST Standard Reference Database Number 69; National Institute of Standards and Technology: Gaithersburg MD, <http://webbook.nist.gov>, (retrieved November 30, 2017).
- (2) Wick, C. D.; Martin, M. G.; Siepmann, J. I. Transferable Potentials for Phase Equilibria. 4. United-Atom Description of Linear and Branched Alkenes and Alkylbenzenes. *J. Phys. Chem. B* **2000**, *104*, 8008-8016.
- (3) Chen, B.; Potoff, J. J.; Siepmann, J. I. Monte Carlo Calculations for Alcohols and Their Mixtures with Alkanes. Transferable Potentials for Phase Equilibria. 5. United-Atom Description of Primary, Secondary, and Tertiary Alcohols. *J. Phys. Chem. B* **2001**, *105*, 3093-3104.
- (4) Stubbs, J. M.; Potoff, J. J.; Siepmann, J. I. Transferable Potentials for Phase Equilibria. 6. United-Atom Description for Ethers, Glycols, Ketones, and Aldehydes. *J. Phys. Chem. B* **2004**, *108*, 17596-17605.
- (5) Wick, C. D.; Stubbs, J. M.; Rai, N.; Siepmann, J. I. Transferable Potentials for Phase Equilibria. 7. Primary, Secondary, and Tertiary Amines, Nitroalkanes and Nitrobenzene, Nitriles, Amides, Pyridine, and Pyrimidine. *J. Phys. Chem. B* **2005**, *109*, 18974-18982.
- (6) Lubna, N.; Kamath, G.; Potoff, J. J.; Raj, N.; Siepmann, J. I. Transferable Potentials for Phase Equilibria. 8. United-atom Description for Thiols, Sulfides, Disulfides, and Thiophene. *J. Phys. Chem. B* **2005**, *109*, 24100-24107.
- (7) Cortes Morales, A. D.; Economou, I. G.; Peters, C. J.; Siepmann, J. I. Influence of Simulation Protocols on the Efficiency of Gibbs Ensemble Monte Carlo Simulations. *Mol. Simul.* **2013**, *39*, 1135-1142.
- (8) Dinpajooh, M.; Bai, P.; Allan, D. A.; Siepmann, J. I. Accurate and Precise Determination of Critical Properties from Gibbs Ensemble Monte Carlo Simulations. *J. Chem. Phys.* **2015**, *143*, 114113.
- (9) Martin, M. G.; Siepmann, J. I. Transferable Potentials for Phase Equilibria. 1. United-Atom Description of n-Alkanes. *J. Phys. Chem. B* **1998**, *102*, 2569-2577.
- (10) Freeman, B. D. Basis of Permeability/Selectivity Tradeoff Relations in Polymeric Gas Separation Membranes. *Macromolecules* **1999**, *32*, 375-380.
- (11) Robeson, L. M.; Freeman, B. D.; Paul, D. R.; Rowe, B. W. An Empirical Correlation of Gas Permeability and Permselectivity in Polymers and its Theoretical Basis. *J. Membr. Sci.* **2009**, *341*, 178-185.
- (12) van der Vegt, N. F. A.; Kusuma, V. A.; Freeman, B. D. Basis of Solubility versus  $T_C$  Correlations in Polymeric Gas Separation Membranes. *Macromolecules* **2010**, *43*, 1473-1479.
